# Supplementary material
Source: publisher figshare collection journal article supplement (https://acs.figshare.com/ndownloader/files/4398958)
Supplement: Supplementary file 1 [file 4398958]

## *Supporting Information*

# **Thermally-Stable, Room-Temperature Ionic Liquids from Amidines and Amines by Adding CS<sub>2</sub>. Comparison with CO<sub>2</sub> Adducts**

**Tao Yu, Taisuke Yamada<sup>†</sup> and Richard G. Weiss\***

Department of Chemistry, Georgetown University,

Washington, DC 20057-1227, USA, e-mail: [weissr@georgetown.edu](mailto:weissr@georgetown.edu)

### **Table of Contents**

|                                                                                        |            |
|----------------------------------------------------------------------------------------|------------|
| <b>1. FT-IR spectra of D/A and D-A-S</b>                                               | <b>S2</b>  |
| <b>2. Viscosity measurements</b>                                                       | <b>S7</b>  |
| <b>3. UV-vis spectroscopic measurements</b>                                            | <b>S8</b>  |
| <b>4. Density measurements</b>                                                         | <b>S9</b>  |
| <b>5. Conductivity and viscosity measurements</b>                                      | <b>S10</b> |
| <b>6. Thermolyses of D-A-S</b>                                                         | <b>S12</b> |
| <b>7. TGA curves of some representative D-A-S</b>                                      | <b>S14</b> |
| <b>8. Transformation from ammonium dithiocarbamates to ammidinium dithiocarbamates</b> | <b>S15</b> |
| <b>9. NMR spectra of D/A and D-A-S</b>                                                 | <b>S18</b> |

---

<sup>†</sup> Present address: Asahi Kasei E-materials, 2-1 Samejima, Fuji, Shizuoka, Japan.

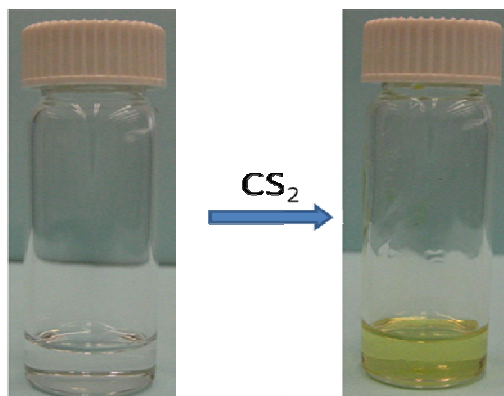

**Figure S1.** Photos of a 1/1 (mol/mol) **C6**/cyclohexylamine mixture before and after addition of one equivalent of  $\text{CS}_2$ .

### 1. Characterizations of D-A-S RTILs

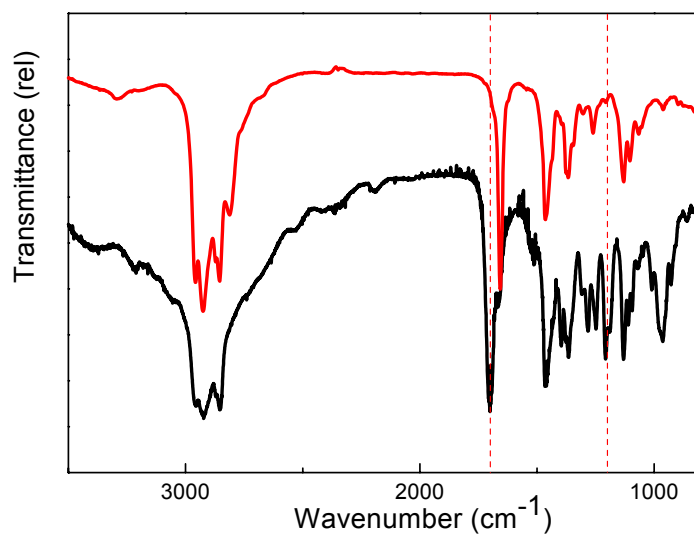

**Figure S2(a).** FT-IR spectra of **C16**/di-*n*-butylamine (red) and **C16**-di-*n*-butylamine- $\text{CS}_2$  (black).

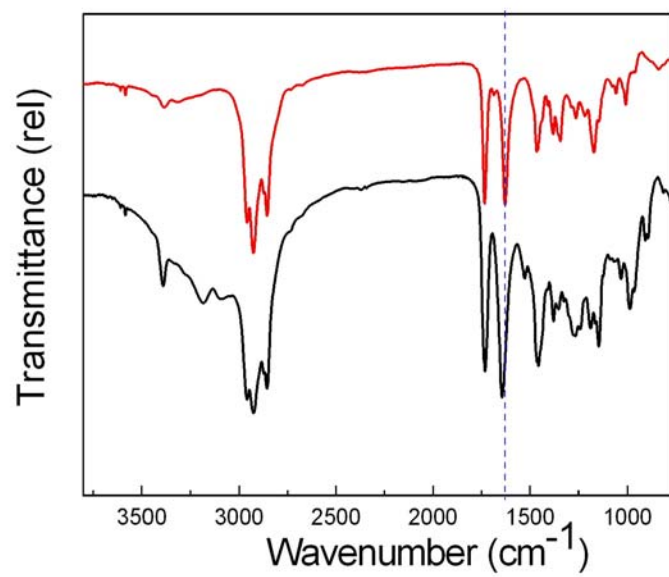

**Figure S2(b).** FT-IR spectra of **C8/IleC8** (red) and **C8-IleC8-CS<sub>2</sub>** (black).

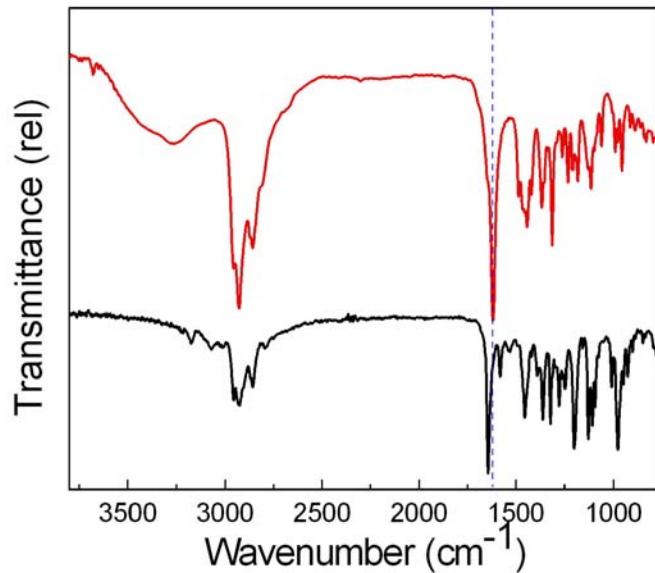

**Figure S2(c).** FT-IR spectra of **DBU/ di-*n*-butylamine** (red) and **DBU-di-*n*-butylamine-CS<sub>2</sub>** (black).

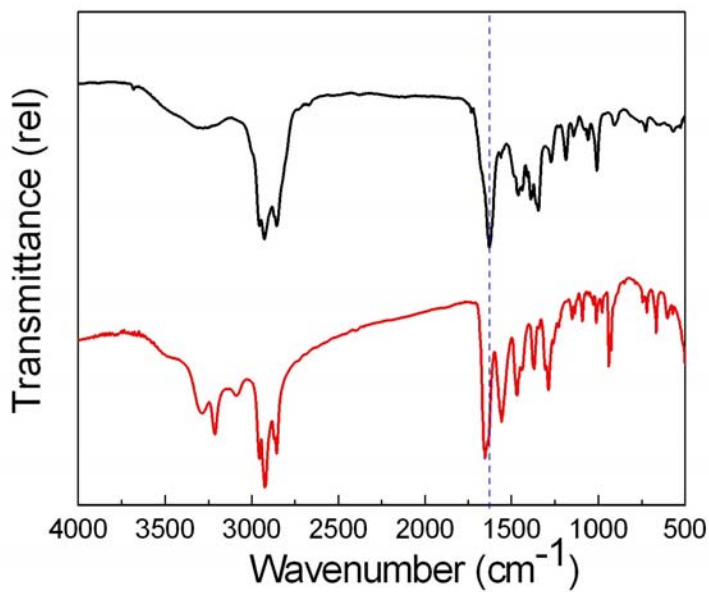

**Figure S2(d).** FT-IR spectra of **C6/octylamine** (black) and **C6-octylamine-CS<sub>2</sub>** (red).

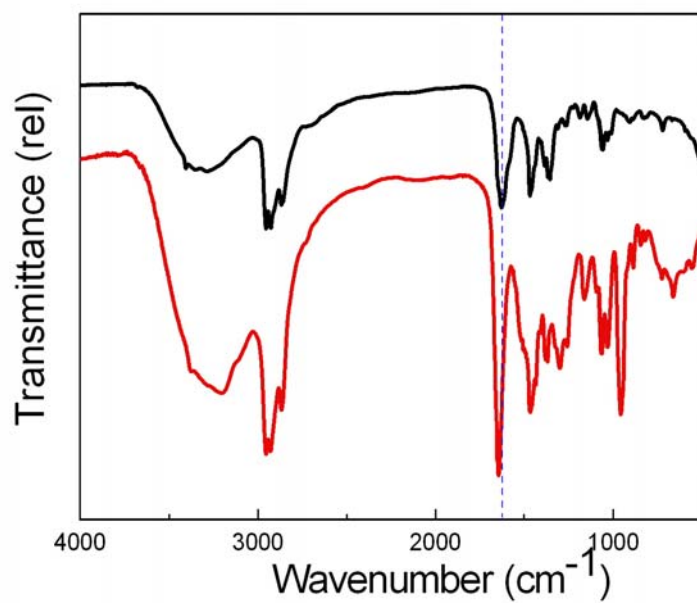

**Figure S2(e).** FT-IR spectra of **C6/LeuOH** (black) and **C6-LeuOH-CS<sub>2</sub>** (red).

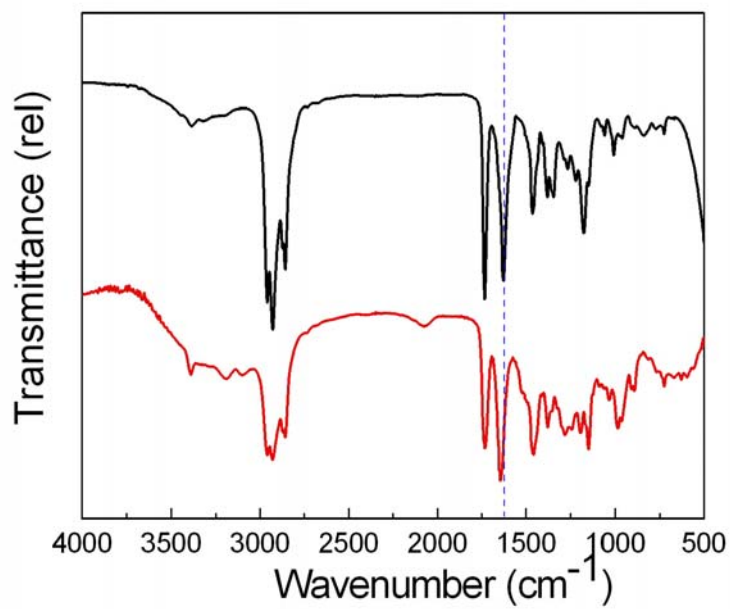

**Figure S2(f).** FT-IR spectra of **C6/IleC8** (black) and **C6-IleC8-CS<sub>2</sub>** (red).

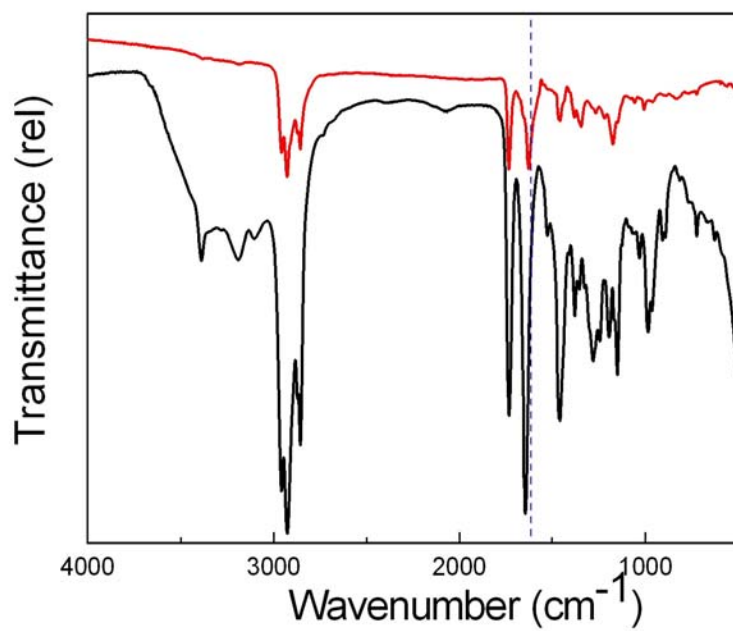

**Figure S2(g).** FT-IR spectra of **C4/IleC8** (red) and **C4-IleC8-CS<sub>2</sub>** (black).

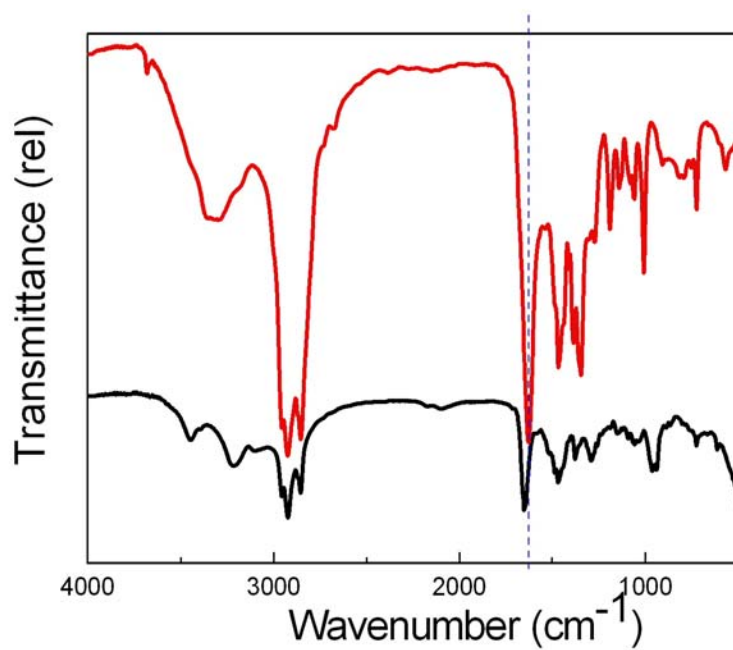

**Figure S2(h).** FT-IR spectra of **C8/octylamine** (red) and **C8-octylamine-CS<sub>2</sub>** (black).

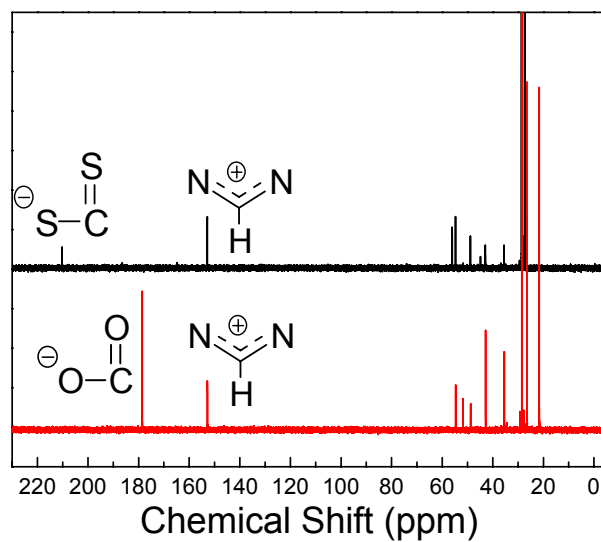

**Figure S3.**  $^{13}\text{C}$  NMR of **tC4**-*t*-butylamine- $\text{CS}_2$  in  $\text{D}_2\text{O}$  (black) and **tC4**-*t*-butylamine- $\text{CS}_2$  after treatment with acetic acid (red) in  $\text{D}_2\text{O}$ .

## 2. Viscosity Measurements

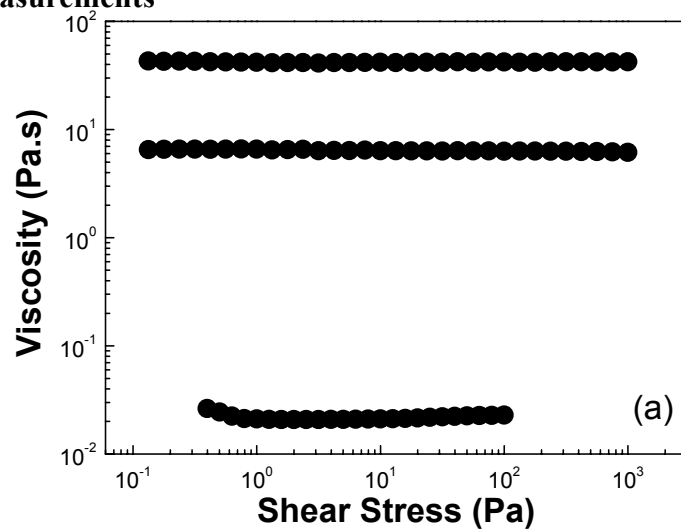

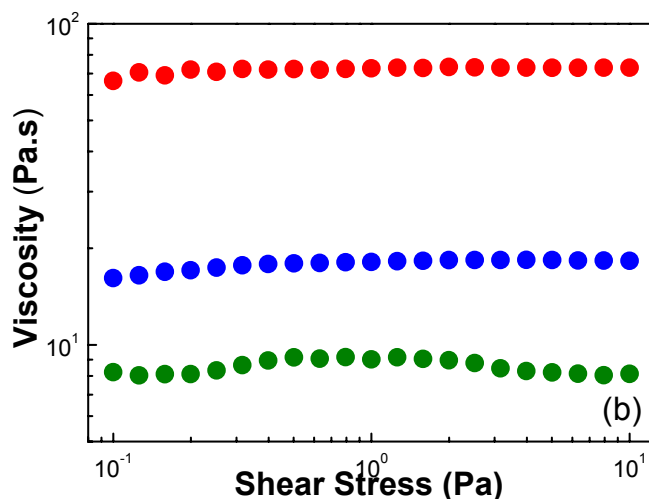

**Figure S4.** (a) Viscosities (Pa·s) at 25 °C of **C8-LeuOH-CS<sub>2</sub>**, **C8-LeuOH-CO<sub>2</sub>** and **C8/LeuOH** (from top to bottom) as a function of shear stress (Pa). (b) Viscosities (Pa·s) of **C8-IleC8-CS<sub>2</sub>** at (from top to bottom) 25, 35, and 45 °C.

### 3. UV-vis spectroscopic measurements

An aliquot of a methanol solution of **DAPNE**<sup>1</sup> was transferred into a sample vial and the methanol was removed by blowing N<sub>2</sub> gas over it. Then, an aliquot of the solvent of interest was added and stirred until the solid completely dissolved. The concentrations of **DAPNE** were 2.4 mM. The absorption spectra were recorded in a 1 mm path length quartz cuvette. The wavelength maxima are collected in Table S1.

**Table S1.** Absorption maxima ( $\lambda_{\text{max}}$ , nm) of 2.4 mM **DAPNE** in various solvents<sup>2</sup> and RTILs.<sup>3</sup>



| <b>solvent</b>                | $\lambda_{\text{max}}$ (nm) |
|-------------------------------|-----------------------------|
| n-heptane                     | 393                         |
| n-decane                      | 396                         |
| C8/Hexylamine                 | 423                         |
| C8/LeuOH                      | 424                         |
| Toluene                       | 425                         |
| THF                           | 427                         |
| Acetone                       | 433                         |
| C8-Hexylamine-CO <sub>2</sub> | 438                         |
| C8-Hexylamine-CS <sub>2</sub> | 440                         |
| C8-ValOH-CO <sub>2</sub>      | 443                         |
| C8-LeuOH-CS <sub>2</sub>      | 444                         |
| DMF                           | 446                         |
| DMSO                          | 456                         |

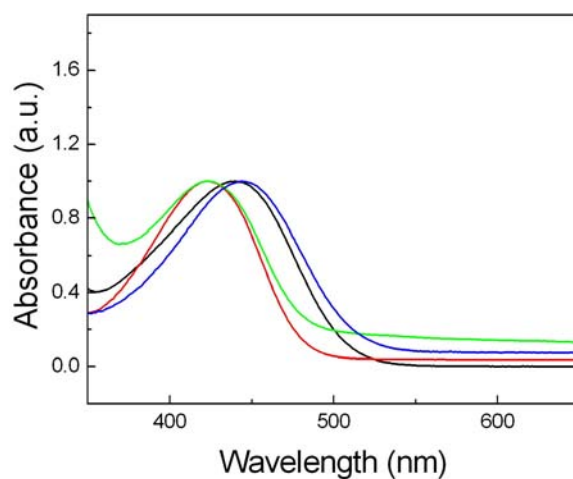

**Figure S5.** UV-vis absorption spectra of DAPNE in **C8**/hexylamine (red), **C8/LeuOH** (green), **C8**-hexylamine-CS<sub>2</sub> (black), and **C8-LeuOH**-CS<sub>2</sub> (blue).

#### 4. Density measurements:<sup>4</sup>

Densities were measured by a method that yields only approximate values. For the purpose that they were used, to construct Walden plots, the values obtained are adequate. An aliquot of C4-hexylamine-CS<sub>2</sub> was weighed in a 1.00 mL volumetric flask that was filled to the mark initially at room temperature. The flask was heated in stages to progressively higher temperatures in a GC oven and equilibrated at each temperature for 15 min before the excess volume from thermal expansion was removed rapidly by syringe and the flask was reweighed. Because the density changes are small over the temperature range investigated (Figure S6), the probable experimental errors have little effect on the overall conclusions derived from them.

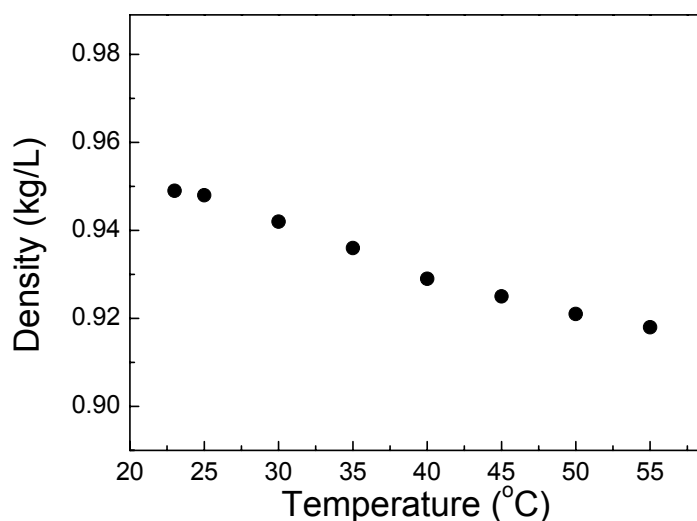

**Figure S6.** Density of C4-hexylamine-CS<sub>2</sub> at different temperatures.

## 5. Conductivity and viscosity measurements

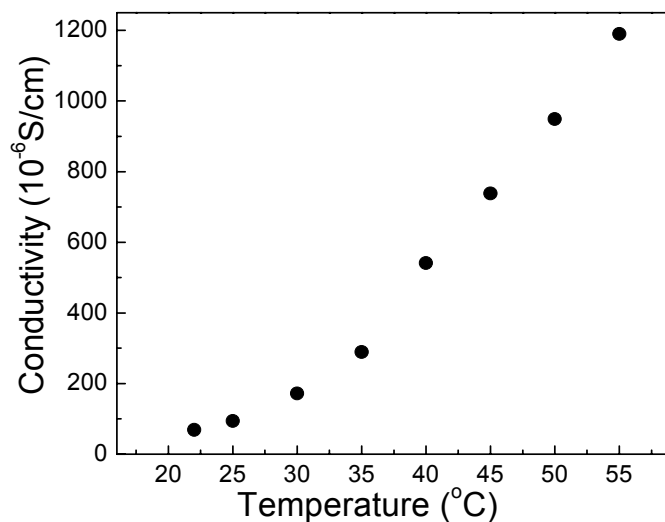

**Figure S7.** Conductivities of neat C4-hexylamine-CS<sub>2</sub> at various temperatures.

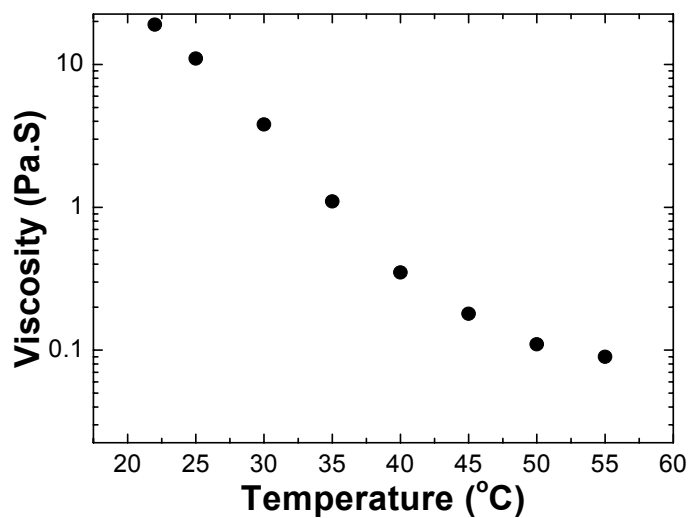

**Figure S8.** Viscosities of neat C4-hexylamine-CS<sub>2</sub> at various temperatures.

**Table S2.** Physicochemical properties of some D-A-S RTILs at room temperature, including density ( $\rho$ ), viscosity ( $\eta$ ), and conductivity ( $\sigma$ ).

| D-A-S | $\rho$ (kg/L) | $\eta$ (Pa·s) | $\sigma$ (10 <sup>-6</sup> S/cm) |
|-------|---------------|---------------|----------------------------------|
|-------|---------------|---------------|----------------------------------|

|                                       |       |    |    |
|---------------------------------------|-------|----|----|
| <b>C4</b> -hexylamine-CS <sub>2</sub> | 0.952 | 9  | 75 |
| <b>C6</b> -hexylamine-CS <sub>2</sub> | 0.958 | 23 | 64 |
| <b>C8</b> -hexylamine-CS <sub>2</sub> | 0.966 | 63 | 39 |

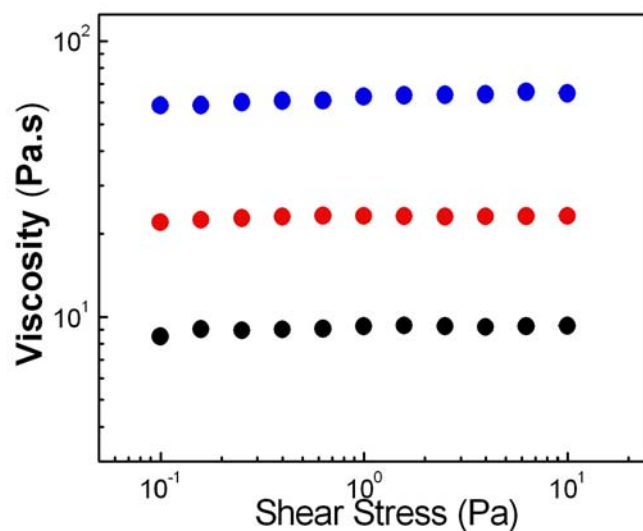

**Figure S9.** Viscosities (Pa.s) of samples as a function of shear stress (Pa) at 25 °C. From bottom to top: **C4**-hexylamine-CS<sub>2</sub> (black), **C6**-hexylamine-CS<sub>2</sub> (red), and **C4**-hexylamine-CS<sub>2</sub> (blue).

## 6. Thermolyses.

*General procedure for synthesis of tC4-t-butylamine-CS<sub>2</sub> and separation of its thermolysis products.* CS<sub>2</sub> liquid (1 mole equivalent) was added slowly to a stirred chloroform solution containing equal molar amounts of **tC4** and *tert*-butylamine, in a round bottom flask. The flask was placed in an ice-water bath during the CS<sub>2</sub> addition (*Warning*: CS<sub>2</sub> is a toxic liquid that should be handled carefully in a well ventilated area.) to dissipate the heat from the exothermic reaction. The mixture was stirred for 1 h at room temperature. Then, the temperature was raised to 120 °C for 2 h. The products were separated by column chromatography (silica gel; 3:1 and 2:1 hexanes:ethyl acetate as eluants) and were identified spectroscopically, using literature assignments for comparison; the literature citations are noted after the name of each compound;

the spectroscopic data below are for the isolated products. Before separation by column, the data from the NMR of the mixture indicated a molar ratio of 58:42 *N-tert-Butyl-N',N'-dimethylthiourea* (**VIII**):*N,N'-Di-tert-butylthiourea* (**IX**).

*Tert-butyl isothiocyanate*<sup>5</sup> (**V**): a liquid, C<sub>5</sub>H<sub>9</sub>NS. <sup>1</sup>H NMR (400MHz, CDCl<sub>3</sub>) δ = 1.37 (9H, s, C(CH<sub>3</sub>)<sub>3</sub>); <sup>13</sup>C NMR (100MHz, CDCl<sub>3</sub>) δ = 131 (C=S), 57 (C(CH<sub>3</sub>)<sub>3</sub>), 30.7 (C(CH<sub>3</sub>)<sub>3</sub>); IR (thin film) ν = 2981, 2081, 1975, 1368, 1207 cm<sup>-1</sup>; MS (EI) m/z (%) 115.

*Tert-butyl thioformamide*<sup>6</sup> (**VI**): a liquid, C<sub>5</sub>H<sub>11</sub>NS. <sup>1</sup>H NMR (400MHz, CDCl<sub>3</sub>) δ = 1.36 (9H, s, C(CH<sub>3</sub>)<sub>3</sub>), 7.6-8.0 (1H, br, s, NH), 9.25-9.28 (1H, d, J=7.8Hz, CH); <sup>13</sup>C NMR (100MHz, CDCl<sub>3</sub>) δ = 187.7 (C=S), 55.8 (C(CH<sub>3</sub>)<sub>3</sub>), 29.8 (C(CH<sub>3</sub>)<sub>3</sub>); IR (thin film) ν = 1567, 1369, 1041 cm<sup>-1</sup>; MS m/z (M<sup>+</sup>) 117.

*N,N-Dimethyl thioformamide*<sup>7</sup> (**VII**): a liquid, C<sub>3</sub>H<sub>7</sub>NS. <sup>1</sup>H NMR (400MHz, CDCl<sub>3</sub>) δ = 3.27-3.29 (6H, d, J=4.6 Hz, N(CH<sub>3</sub>)<sub>2</sub>), 9.2 (1H, s, CH); <sup>13</sup>C NMR (100MHz, CDCl<sub>3</sub>) δ = 188.2 (C=S), 45.3 (N(CH<sub>3</sub>)<sub>2</sub>), 37.2 (N(CH<sub>3</sub>)<sub>2</sub>); IR (thin film) ν = 1540, 1397, 1130, 1040 cm<sup>-1</sup>; MS m/z (M<sup>+</sup>) 89.

*N-tert-Butyl-N',N'-dimethylthiourea*<sup>8</sup> (**VIII**): a white solid, mp 85-88 °C (no reported lit value); C<sub>7</sub>H<sub>16</sub>N<sub>2</sub>S. <sup>1</sup>H NMR (400MHz, CDCl<sub>3</sub>) δ = 1.54 (9H, s, C(CH<sub>3</sub>)<sub>3</sub>), 3.21 (6H, s, N(CH<sub>3</sub>)<sub>2</sub>) 5.1-5.3 (1H, br, s, NH); <sup>13</sup>C NMR (100MHz, CDCl<sub>3</sub>) δ = 181.2 (C=S), 56.0 (C(CH<sub>3</sub>)<sub>3</sub>), 29.7 (C(CH<sub>3</sub>)<sub>3</sub>); IR (ATR) ν = 1548, 1393, 1346, 1131, 1050 cm<sup>-1</sup>; MS m/z (M<sup>+</sup>) 160.

*N,N'-Di-tert-butylthiourea*<sup>9</sup> (**IX**): a white solid, mp 128-130 °C (lit.<sup>9</sup> mp 131-132 °C); C<sub>9</sub>H<sub>20</sub>N<sub>2</sub>S. <sup>1</sup>H NMR (400 MHz, CDCl<sub>3</sub>) δ = 1.48 (18H, s, C(CH<sub>3</sub>)<sub>3</sub>), 5.7-5.8 (2H, br, NH); <sup>13</sup>C NMR (100MHz, CDCl<sub>3</sub>) δ = 180.2 (C=S), 54.0 (N(CH<sub>3</sub>)<sub>2</sub>); IR (ATR) ν = 3300, 1540, 1320, 1210 cm<sup>-1</sup>. MS m/z (M<sup>+</sup>) 188.

*Procedures for identification of dimethylamine and t-butylamine upon thermolyses of*

***tC4-t-butylamine-CS<sub>2</sub>***. A HCl/D<sub>2</sub>O solution was prepared by bubbling HCl gas (generated by dropping sulfuric acid into hydrochloric acid and passed through a Drierite tube) into D<sub>2</sub>O in a round-bottom flask. Then, the vapor from thermolysis of ***tC4-t-butylamine-CS<sub>2</sub>*** was introduced into the HCl/D<sub>2</sub>O solution that had been cooled in an ice-water bath. The peaks characteristic of the hydrochloride salts of dimethylamine and *t*-butylamine were found in the <sup>1</sup>H NMR and <sup>13</sup>C NMR spectra.

*Dimethylammonium chloride*<sup>10</sup>: <sup>1</sup>H NMR (400 MHz, CDCl<sub>3</sub>) δ = 2.88 (6H, s, N(CH<sub>3</sub>)<sub>2</sub>); <sup>13</sup>C NMR (100 MHz, CDCl<sub>3</sub>) δ = 32.6 (N(CH<sub>3</sub>)<sub>2</sub>).

*Tert-butylammonium chloride*<sup>11</sup>: <sup>1</sup>H NMR (400 MHz, CDCl<sub>3</sub>) δ = 1.10 (9H, s, C(CH<sub>3</sub>)<sub>3</sub>); <sup>13</sup>C NMR (100 MHz, CDCl<sub>3</sub>) δ = 26.5 (C(CH<sub>3</sub>)<sub>3</sub>), 48.8 (C(CH<sub>3</sub>)<sub>3</sub>).

## 7. TGA curves of some representative D-A-S RTILs

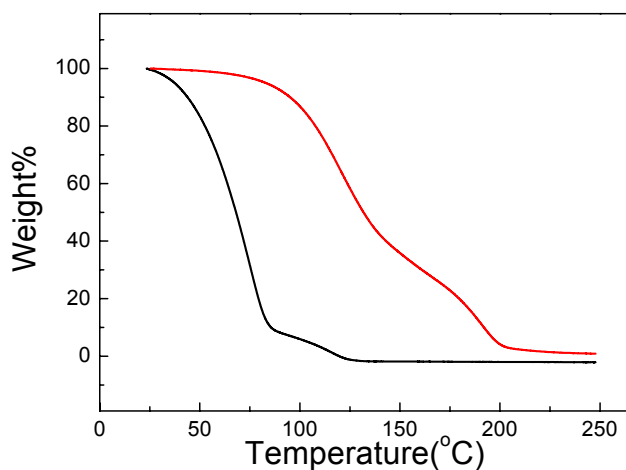

**Figure S10 (a).** TGA curves of **C4**/octylamine (black) and **C4**-octylamine-CS<sub>2</sub> (red).

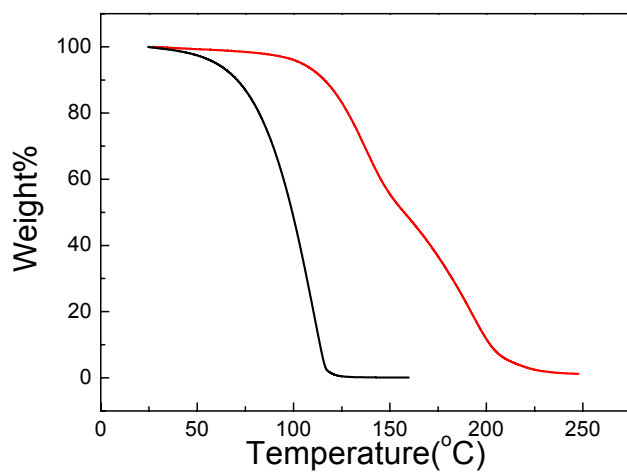

**Figure S10 (b).** TGA curves of **C8/ProOH** (black) and **C8-ProOH-CS<sub>2</sub>** (red).

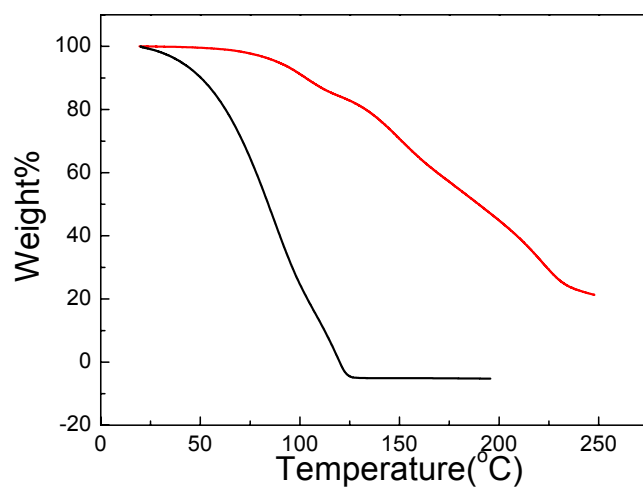

**Figure S10 (c).** TGA curves of **C8/octylamine** (black) and **C8-octylamine-CS<sub>2</sub>** (red).

## 8. Transformation from ammonium dithiocarbamates to amidinium dithiocarbamates.

CS<sub>2</sub> liquid (0.16 g and 21 mmol) was added slowly to a round-bottom flask containing a

stirred solution of 0.43 g (42 mmol) *n*-hexylamine in 2 mL chloroform-*d*. The solution was stirred for 30 min at room temperature in a dry atmosphere.  $^1\text{H}$  and  $^{13}\text{C}$  NMR spectra of a sample were recorded and shown to be the ammonium dithiocarbamate (Figure S11a). Then, 0.71 g (42 mmol) C6 amidine and 0.16 g (21 mmol)  $\text{CS}_2$  were added. After another 30 min of stirring,  $^1\text{H}$  and  $^{13}\text{C}$  NMR (Figure S11b) of an aliquot were recorded. They demonstrated that the product was the amidinium dithiocarbamate without any detectable amount of ammonium dithiocarbamate.

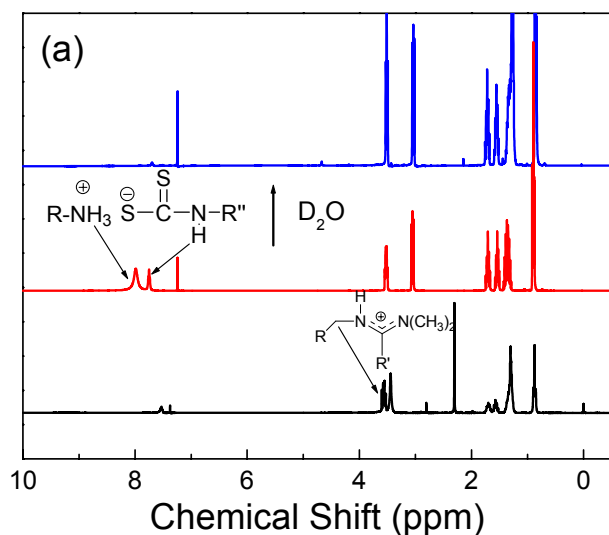



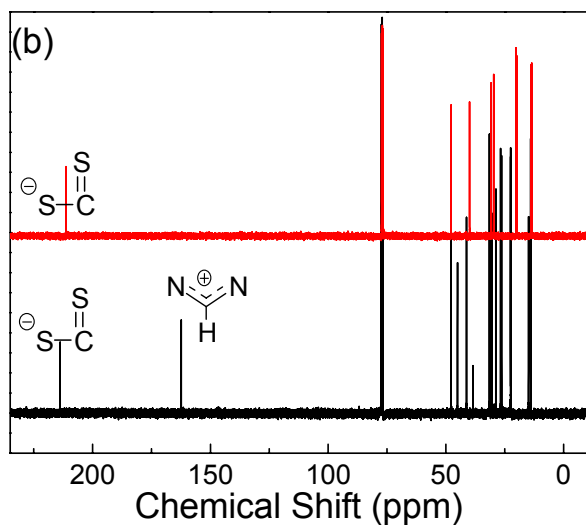

**Figure S11.** (a)  $^1\text{H}$  NMR spectra in  $\text{CDCl}_3$  of *n*-hexylamine- $\text{CS}_2$  before (red) and after (black) adding 1.0 equivalent **C6** and 0.5 equivalent  $\text{CS}_2$ . The blue spectrum was obtained by adding one drop of  $\text{D}_2\text{O}$  to the *n*-hexylamine- $\text{CS}_2$  in  $\text{CDCl}_3$  sample as a means to verify the locations of the N—H peaks in the red spectrum. (b)  $^{13}\text{C}$  NMR spectra in  $\text{CDCl}_3$  of *n*-hexylamine- $\text{CS}_2$  before (red) and after (black) adding 1.0 equivalent **C6** and 0.5 equivalent  $\text{CS}_2$ . The concentrations are lower than described above.

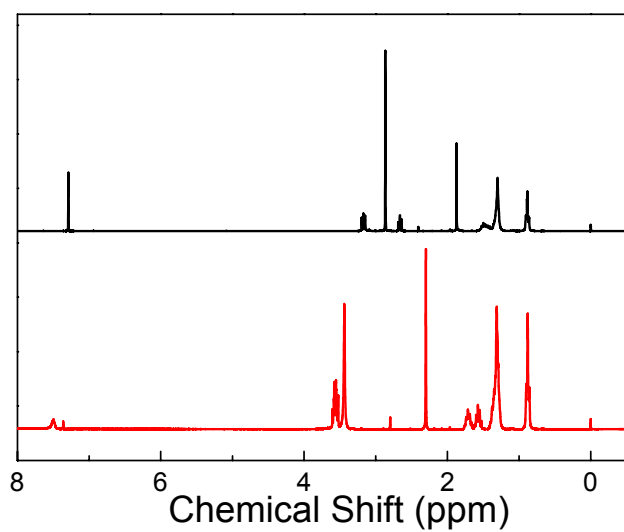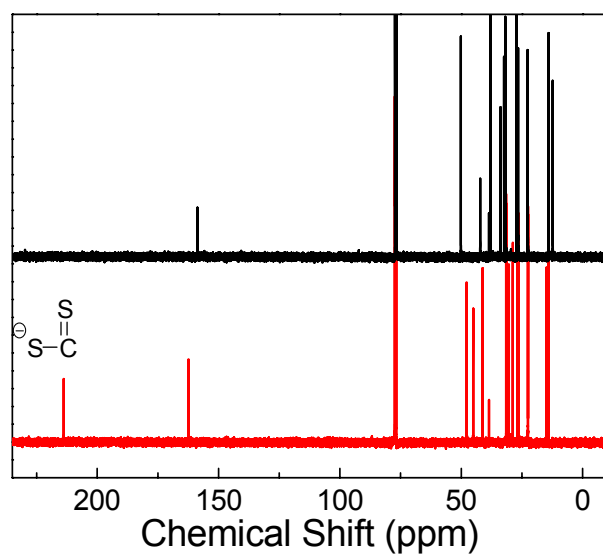

**Figure S12.**  $^1\text{H}$  (a) and  $^{13}\text{C}$  (b) NMR spectra in  $\text{CDCl}_3$  of **C6**/*n*-hexylamine (black) and **C6**-*n*-hexylamine- $\text{CS}_2$  (red).

## 9. NMR spectra of D/A and D-A-S

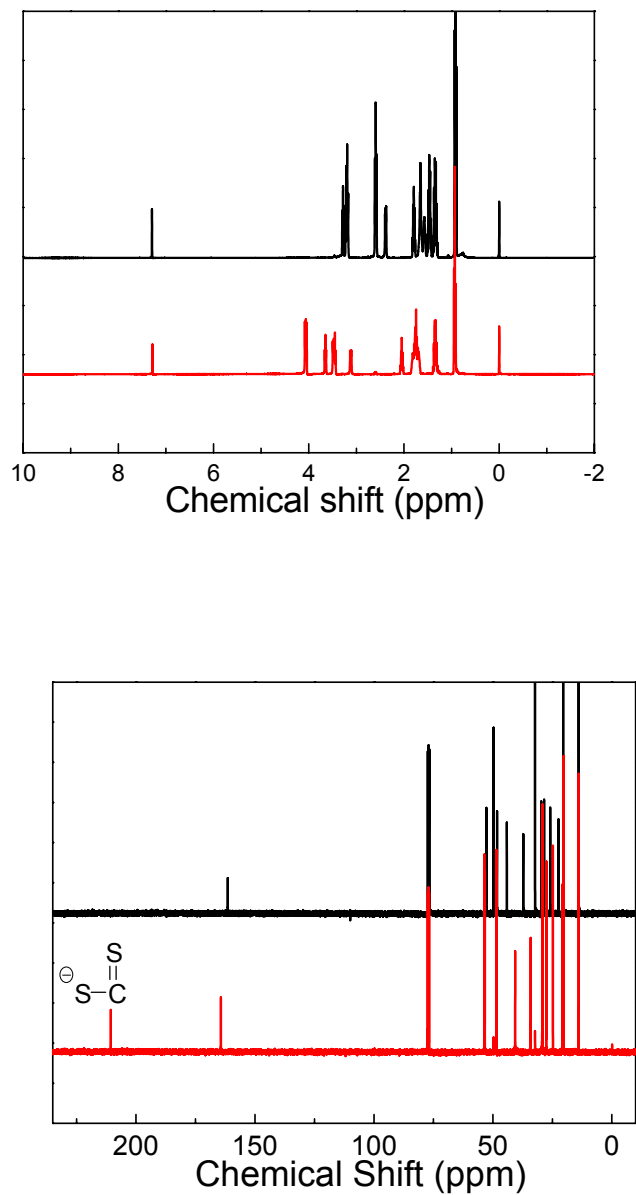

**Figure S13.**  $^1\text{H}$  (a) and  $^{13}\text{C}$  (b) NMR spectra in  $\text{CDCl}_3$  of **DBU**/di-*n*-butylamine (black) and **DBU**-di-*n*-butylamine- $\text{CS}_2$  (red).

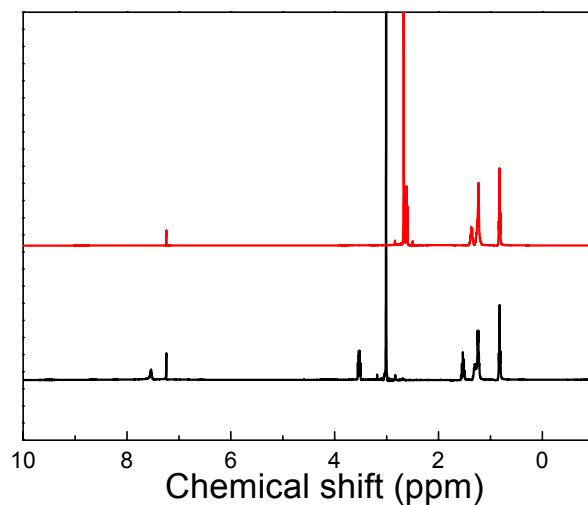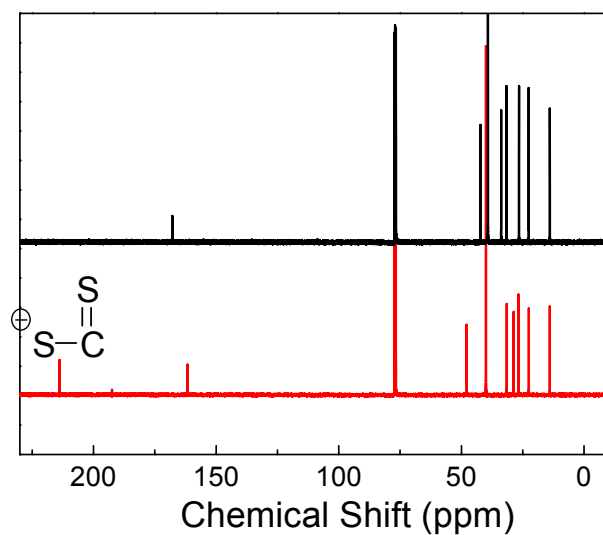

**Figure S14.**  $^1\text{H}$  (a) and  $^{13}\text{C}$  (b) NMR spectra in  $\text{CDCl}_3$  of **TMG**/*n*-hexylamine (black) and **TMG**-*n*-hexylamine- $\text{CS}_2$  (red).

(1) (a) Reichardt, C. *Chem. Soc. Rev.* **1992**, *21*, 147–153. (b) Reichardt, C. *Chem. Rev.* **1994**, *94*,

---

2319–2358.

- (2) Richter-Egger, D. L.; Tesfal, A.; Flamm, S. J.; Tucker, S. A. *J. Chem. Educ.* **2001**, *78*, 1375–1378.
- (3) Yamada, T.; Lukac, P. J.; Yu, T.; Weiss, R. G. *Chem. Mater*, **2007**, *19*, 4761–4768.
- (4) Xu, W.; Cooper, E. I.; Angell, C. A. *J. Phys. Chem. B* **2003**, *107*, 6170–6178.
- (5) Bassas, O. Huuskonen, J.; Rissanen, K.; Koskinen, A. M. P. *Eur. J. Org. Chem.* **2009**, 1340–1351.
- (6) Stockdill, J. L.; Wu, X.; Danishefsky, S. J. *Tetrahedron Lett.* **2009**, *50*, 5152–5155.
- (7) Shibahara, F.; Sugiura, R.; Murai, T. *Org. Lett.* **2009**, *11*, 3064–3067.
- (8) Custelcean, R.; Gorbunova, M. G.; Bonnesen, P. V. *Chem. Eur. J.* **2005**, *11*, 1459–1466.
- (9) Ballabeni, M.; Ballini, R.; Bigi, F.; Maggi, R.; Parrini, M.; Predieri, G.; Sartori, G. *J. Org. Chem.* **1999**, *64*, 1029–1032.
- (10) Cheng, C.; Sun, J.; Xing, L.; Xu, J.; Wang, X.; Hu, Y. *J. Org. Chem.* **2009**, *74*, 5671–5674.
- (11) Engle, P. S.; Bishop, D. J. *J. Am. Chem. Soc.* **1975**, *97*, 6754–6762.
